# Supplementary material for: A Short Series of Case Reports of COVID-19 in Immunocompromised Patients
Source: MDPI journal article supplement (doi:10.3390/v14050934), 2022-04-29
Supplement: s1 [file s1]

Supplementary materials

# A Short Series Case Reports of COVID-19 in Immunocompromised Patients

**Table S1.** Ct value, genome recovery (%), Variant and GISAID submission details of eight immunocompromised patients.

| Patient ID | CII-Sample-ID | Sample Type   | Collection Date (yyyy-mm-dd) | Ct values in qRT-PCR |              |       | % SARS-CoV-2 Genome recovery | GISAID Accession ID |
|------------|---------------|---------------|------------------------------|----------------------|--------------|-------|------------------------------|---------------------|
|            |               |               |                              | N1                   | N2           | RP    |                              |                     |
| Pt 1       | SBA-001       | serum         | 2021-04-06                   | 31.07                | 29.93        | 25.82 | 99.75                        | EPI_ISL_4298277     |
|            | SBA-002       | serum         | 2021-04-12                   | 32.32                | 31.65        | 28.02 | 98.46                        | -                   |
|            | SBA-003       | serum         | 2021-04-19                   | Undetermined         | Undetermined | 27.48 | -                            | -                   |
| Pt 2       | SBA-010       | serum         | 2021-04-14                   | Undetermined         | Undetermined | 32.40 | -                            | -                   |
|            | SBA-011       | serum         | 2021-04-19                   | Undetermined         | Undetermined | 29.23 | -                            | -                   |
| Pt 3       | SBA-014       | serum         | 2021-04-14                   | Undetermined         | Undetermined | 27.30 | -                            | -                   |
|            | SBA-015       | serum         | 2021-04-18                   | Undetermined         | Undetermined | 27.79 | -                            | -                   |
| Pt 4       | SBA-016       | serum         | 2021-04-14                   | Undetermined         | Undetermined | 29.27 | -                            | -                   |
|            | SBA-017       | serum         | 2021-04-18                   | Undetermined         | Undetermined | 32.21 | -                            | -                   |
| Pt 5       | SBA-004       | serum         | 2021-04-03                   | 35.61                | 34.82        | 26.29 | 15.75                        | -                   |
|            | SBA-005       | serum         | 2021-04-08                   | Undetermined         | Undetermined | 25.26 | -                            | -                   |
| Pt 6       | SBA-006       | serum         | 2021-04-03                   | Undetermined         | Undetermined | 28.68 | -                            | -                   |
|            | SBA-007       | serum         | 2021-04-08                   | Undetermined         | Undetermined | 28.22 | -                            | -                   |
| Pt 7       | SBA-008       | serum         | 2021-04-08                   | Undetermined         | Undetermined | 25.92 | -                            | -                   |
|            | SBA-009       | serum         | 2021-04-13                   | Undetermined         | Undetermined | 26.41 | -                            | -                   |
| Pt 8       | SBA-012       | serum         | 2021-04-14                   | Undetermined         | Undetermined | 28.17 | -                            | -                   |
|            | SBA-013       | serum         | 2021-04-19                   | Undetermined         | Undetermined | 28.62 | -                            | -                   |
| Pt 1       | SBA-018       | swab in VTM   | 2021-04-08                   | 22.24                | 21.35        | 25.83 | 100.00                       | EPI_ISL_4298278     |
| Pt 5       | SBA-019       | swab in VTM   | 2021-04-08                   | 43.67                | 40.27        | 28.01 | 82.96                        | -                   |
| Pt 6       | SBA-020       | swab in VTM   | 2021-04-08                   | 34.75                | 33.69        | 29.04 | 99.19                        | EPI_ISL_4298280     |
| Pt 7       | SBA-021       | swab in VTM   | 2021-04-13                   | 31.91                | 30.79        | 26.73 | 99.90                        | EPI_ISL_4298281     |
| Pt 1       | SBA-018-TC    | Virus culture |                              | 22.00                | 21.80        |       | 100                          | EPI_ISL_4298279     |

**Table S2.** Immunological parameters (Erythrocyte sedimentation rate (ESR), C-Reactive Protein (CRP), White Blood Cell (WBC), Absolute Lymphocyte counts and Procalcitonin levels) during hospitalization of 8 immunocompromised patients.

|             | ESR (mm/hr) ref range <20 |                 | CRP (mg/dL) ref range <0.5 |                 | WBC (K/uL) (ref range 5-10) |                 | Absolute Lymphocytes (ref range 0.8-5 K/uL) |                 | Procalcitonin (ng/mL) ref range <0.15 |
|-------------|---------------------------|-----------------|----------------------------|-----------------|-----------------------------|-----------------|---------------------------------------------|-----------------|---------------------------------------|
| Patient IDs | admission                 | discharge/death | admission                  | discharge/death | admission                   | discharge/death | admission                                   | discharge/death |                                       |

---

|      |     |    |      |      |      |      |      |     |       |
|------|-----|----|------|------|------|------|------|-----|-------|
| Pt 1 | 85  | 17 | 23.4 | 0.8  | 18.7 | 8.7  | 240  | 90  | 6.27  |
| Pt 2 | 32  | 15 | <0.3 | <0.3 | 2.18 | 4.35 | 110  | 220 | 0.12  |
| Pt 3 | 50  | 11 | 26.4 | 0.3  | 43.5 | 37.6 | 5660 | 750 | 52.86 |
| Pt 4 | 72  | 53 | <0.3 | <0.3 | 13.3 | 16.7 | 1180 | 540 | 0.24  |
| Pt 5 | 25  | 33 | 13.2 | 1.2  | 2.79 | 28.8 | 310  | 270 | 0.62  |
| Pt 6 | 25  | 62 | 6.5  | 12.1 | 11.1 | 17.2 | 440  | 690 | 0.12  |
| Pt 7 | 114 | 48 | 28.4 | 3    | 13.2 | 15.8 | 930  | 430 | 0.44  |
| Pt 8 | 41  | 13 | 16.7 | 0.7  | 9.39 | 6.84 | 420  | 930 | 0.14  |

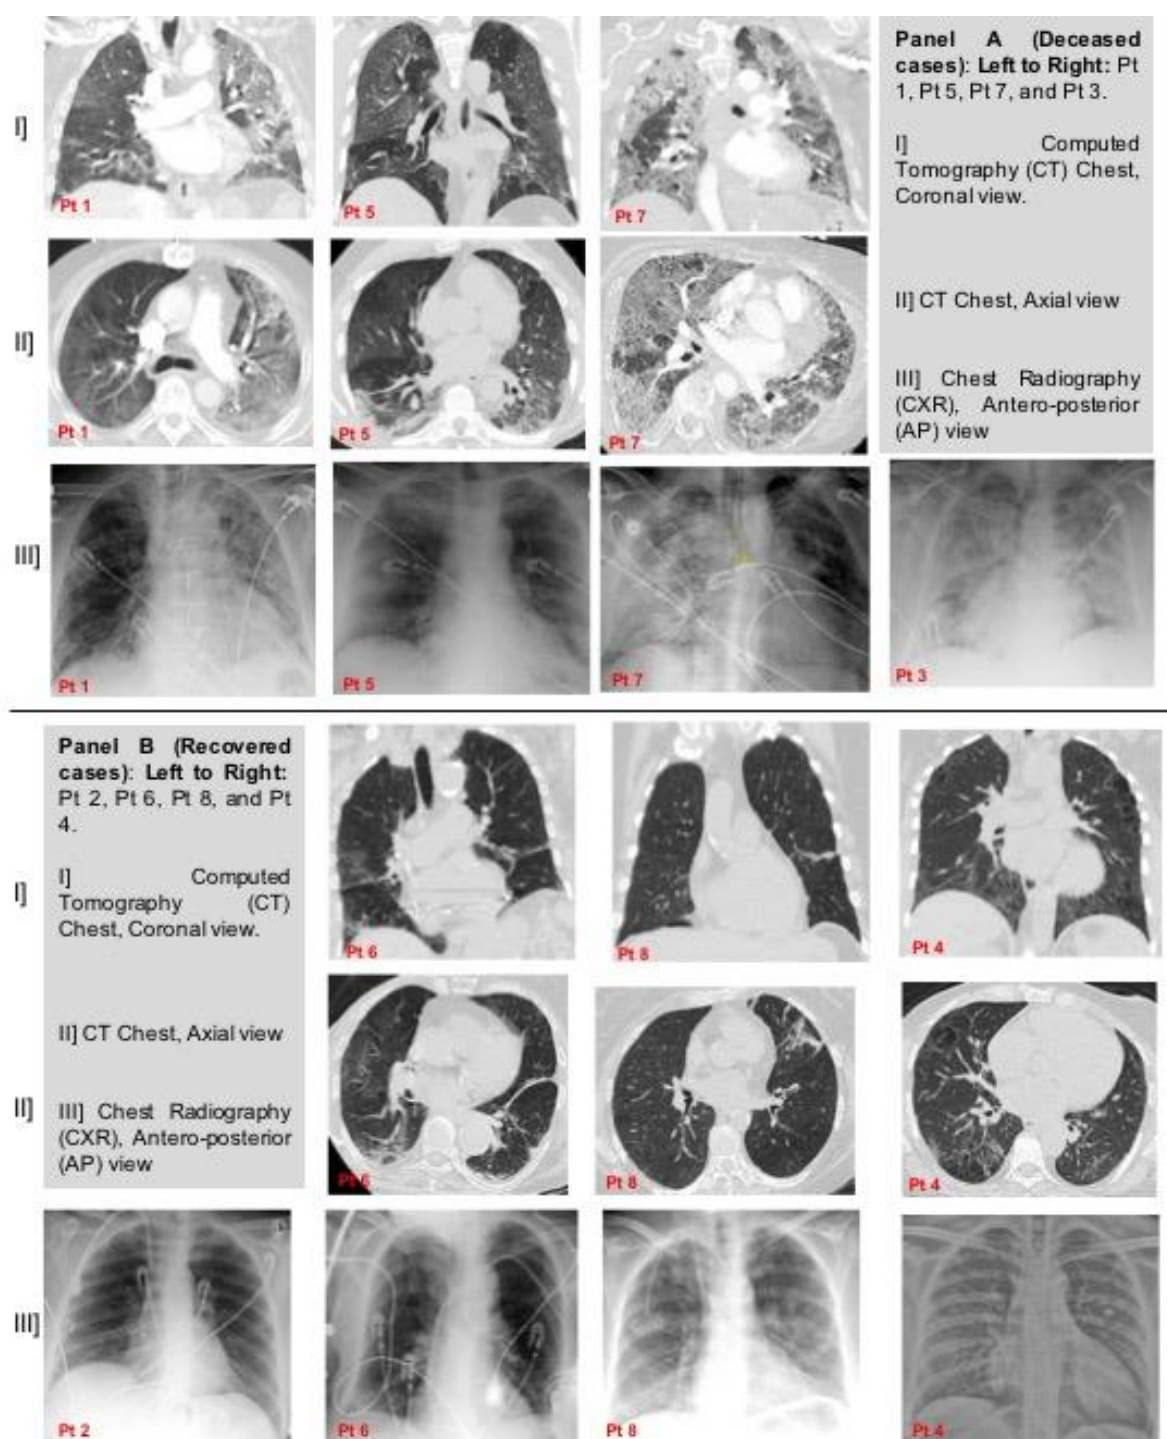

**Figure S1.** Computed tomography images (coronal and axial views) of deceased cases (A) and recovered cases (B) of 8 immunocompromised patients. Top panel A images show increased burden of diffuse multifocal ground glass opacities in bilateral lungs whereas bottom panel B images show mainly patchy airspace disease with intermittent areas of ground glass opacities.
